# Supplementary material for: MIF inhibition interferes with the inflammatory and T cell-stimulatory capacity of NOD macrophages and delays autoimmune diabetes onset
Source: PubMed Central journal article supplement (PMC5667746; doi:10.1371/journal.pone.0187455), 2017-11-02

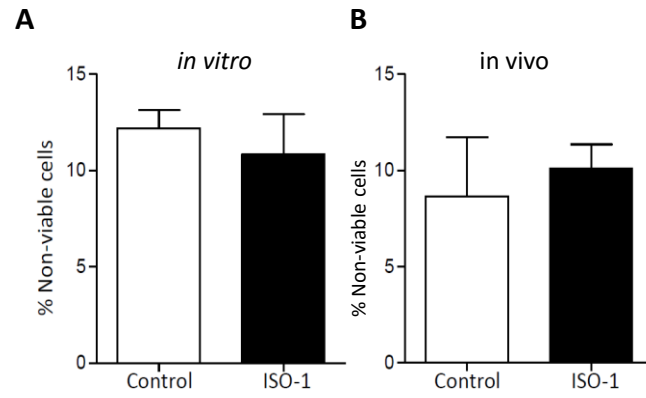

Supplement: pone.0187455.s003.pdf [file pone.0187455.s003.pdf]
